# Supplementary material for: Sequence characteristics and phylogenetic analysis of H9N2 subtype avian influenza A viruses detected from poultry and the environment in China, 2018
Source: PeerJ journal article supplement (doi:10.7717/peerj.12512), 2021-12-20
Supplement: peerj-50819-Raw_data_of_RT-PCR_system.pdf [file peerj-50819-Raw_data_of_RT-PCR_system.pdf]

### Primers used for RT-PCR

| Name of primer | Sequence                                    | Gene |
|----------------|---------------------------------------------|------|
| Bm-HA-F        | 5' -TATTCGTCTCAGGGAGCAAAGCAGGG-3'           | HA   |
| Bm-HA-R        | 5' -ATATCGTCTCGTATTAGTAGAAACAAGGGTGTTTT-3'  |      |
| Ba-NA-F        | 5' -TATTGGTCTCAGGGAGCAAAAGCAGGAGT-3'        | NA   |
| Ba-NA-R        | 5' -ATATGGTCTCGTATTAGTAGAAACAAGGAGTTTTTT-3' |      |

#### Reaction system:

|                                 |              |
|---------------------------------|--------------|
| Premix <i>Taq</i> <sup>TM</sup> | 25 $\mu$ L   |
| AMV reverse transcriptase       | 0.4 $\mu$ L  |
| RNasin ribonuclease inhibitor   | 0.6 $\mu$ L  |
| Reverse primer and              | 0.1 $\mu$ L  |
| Forward primer                  | 0.1 $\mu$ L  |
| Nuclease-free water             | 18.2 $\mu$ L |
| RNA                             | 4 $\mu$ L    |

#### Reaction cycling:

|           |                   |
|-----------|-------------------|
|           | 42°C for 45 min   |
|           | 95°C for 3min     |
| 35 cycles | 94°C for 30s      |
|           | 56°C for 30s      |
|           | 68°C for 2min 30s |
|           | 72°C for 10min    |
